# Supplementary material
Source: Springer Nature journal article supplement (https://www.springermedizin.de/resource/supplementary/12884_2011_473_MOESM3_ESM.pdf/9457766)
Supplement: MOESM3 [file 9457766]

**TABLE 2: STATISTICAL SUMMARY OF THE EXPLANATORY VARIABLES**

| EXPLANATORY VARIABLES                 | SUMMARY |                |
|---------------------------------------|---------|----------------|
|                                       | NUMBER  | PERCENTAGE (%) |
| <b>Maternal factors</b>               |         |                |
| <b>Maternal education</b>             |         |                |
| No education                          | 1,4418  | 50.3           |
| Primary                               | 6,552   | 22.9           |
| Secondary or higher                   | 7,677   | 26.8           |
| <b>Maternal occupation</b>            | 9,035   | 31.7           |
| Not working                           | 9,035   | 31.7           |
| Business or cleric                    | 9,985   | 35.1           |
| Manual                                | 9,470   | 33.2           |
| <b>Parity</b>                         |         |                |
| 1                                     | 3,061   | 10.7           |
| 2, 3 and 4                            | 13,759  | 48.0           |
| ≥5                                    | 11,827  | 41.3           |
| <b>Marital status</b>                 |         |                |
| Never married                         | 506     | 1.8            |
| Currently married                     | 27,378  | 95.6           |
| Formerly married                      | 762     | 2.7            |
| <b>Maternal age</b>                   |         |                |
| ≤ 20 years                            | 3,319   | 11.6           |
| 21 – 25 years                         | 6,787   | 23.7           |
| 26 – 30 years                         | 8,157   | 28.5           |
| 31 – 35 years                         | 5,043   | 17.6           |
| > 35 years                            | 5,341   | 18.6           |
| <b>Maternal age at first marriage</b> |         |                |
| < 15 years                            | 7,967   | 28.3           |
| 15 – 19 years                         | 12,706  | 45.2           |
| 20 – 24 years                         | 5,243   | 18.6           |
| ≥ 25 years                            | 2,225   | 7.9            |
| <b>Family planning</b>                |         |                |
| No method                             | 24,952  | 87.1           |
| Folkloric / traditional               | 1,072   | 3.7            |
| Modern                                | 2,647   | 9.2            |
| <b>Preceding birth interval</b>       |         |                |
| < 18 months                           | 1,719   | 7.4            |
| 18 – 36 months                        | 12,634  | 54.3           |
| > 36 months                           | 8,902   | 38.3           |
| <b>Breastfeeding</b>                  |         |                |
| < 6 months                            | 4,722   | 17.5           |

| EXPLANATORY VARIABLES                | SUMMARY |                |
|--------------------------------------|---------|----------------|
|                                      | NUMBER  | PERCENTAGE (%) |
| 6 – 12 months                        | 6,266   | 23.2           |
| >12 – 18 months                      | 8,629   | 32.0           |
| >18 months                           | 7,351   | 27.3           |
| <b>Health seeking behaviour</b>      |         |                |
| Low                                  | 15,722  | 49.0           |
| Average                              | 5704    | 21.4           |
| Good                                 | 5224    | 19.6           |
| <b>Child factors</b>                 |         |                |
| <b>Sex</b>                           |         |                |
| Male                                 | 14,604  | 51.0           |
| Female                               | 14,043  | 49.0           |
| <b>Birth order</b>                   |         |                |
| 1,                                   | 5, 353  | 18.7           |
| 2 to 4                               | 13,069  | 45.6           |
| ≥5                                   | 10,225  | 35.7           |
| <b>Birth weight</b>                  |         |                |
| Large                                | 13, 012 | 46.5           |
| Average                              | 10,732  | 38.4           |
| Small                                | 4,239   | 15.1           |
| <b>Paternal &amp; family factors</b> |         |                |
| <b>Family size</b>                   |         |                |
| 1 – 5                                | 11,557  | 40.3           |
| >5                                   | 17,090  | 59.7           |
| <b>Sanitation</b>                    |         |                |
| Good toilet                          | 2,955   | 10.5           |
| Bad toilet                           | 25,136  | 89.5           |
| <b>Fuel sources</b>                  |         |                |
| Gas                                  | 250     | 0.9            |
| Kerosene                             | 3,606   | 12.7           |
| Other                                | 24,518  | 86.4           |
| <b>No of wives</b>                   |         |                |
| One wife                             | 18,063  | 66.4           |
| Two or more wives                    | 9,128   | 33.6           |
| <b>Wealth index</b>                  |         |                |
| Poor                                 | 14,475  | 50.5           |
| Middle                               | 5,609   | 19.6           |
| Rich                                 | 8,563   | 29.9           |
| <b>Water source</b>                  |         |                |
| Safe water                           | 13,021  | 46.3           |
| Unsafe water                         | 15,122  | 53.7           |
| <b>Paternal age</b>                  |         |                |
| < 22 years                           | 264     | 1.0            |

| EXPLANATORY VARIABLES      | SUMMARY |                |
|----------------------------|---------|----------------|
|                            | NUMBER  | PERCENTAGE (%) |
| 22 – 30 years              | 5,453   | 20.3           |
| 31 – 40 years              | 10,854  | 40.4           |
| 41 – 50 years              | 7,011   | 26.0           |
| >50 years                  | 3,277   | 12.2           |
| <b>Paternal occupation</b> |         |                |
| Business or cleric         | 7,815   | 28.1           |
| Farming                    | 12,645  | 45.5           |
| Manual                     | 7,312   | 26.3           |
| <b>Others factors</b>      |         |                |
| <b>Residence</b>           |         |                |
| Rural                      | 21,034  | 73.4           |
| Urban                      | 7,613   | 26.6           |
| <b>Ethnicity</b>           |         |                |
| Major                      | 16,838  | 59.1           |
| Minor                      | 11,643  | 40.9           |
| <b>Region</b>              |         |                |
| North central              | 5,046   | 17.6           |
| North east                 | 6,559   | 22.9           |
| North west                 | 7,947   | 27.7           |
| South east                 | 2,450   | 8.6            |
| South west                 | 3,327   | 11.6           |
| South south                | 3,318   | 11.6           |
